# Supplementary material for: Abiotic and Biotic Damage of Microalgae Generate Different Volatile Organic Compounds (VOCs) for Early Diagnosis of Algal Cultures for Biofuel Production
Source: MDPI journal article supplement (doi:10.3390/metabo11100707), 2021-10-15
Supplement: s1 [file s1]

## Supplementary material

**Supplemental Table S1.** VOCs Emitted During Grazing of *Microchloropsis gaditana* by *Brachionus plicatilis* and Did Not Pass the Strict Criteria for Classification as Putative Biomarkers

| Compound | Tentative Compound Class | NIST14 ID                     | NIST % Match | Base Peak m/z | Experimental RI | Theoretical RI | A+R Expt 1 |        |      | A+R Expt 2 |        |      | A+R Expt 3 |      |       |
|----------|--------------------------|-------------------------------|--------------|---------------|-----------------|----------------|------------|--------|------|------------|--------|------|------------|------|-------|
|          |                          |                               |              |               |                 |                | 48 h       | 72 h   | 96 h | 48 h       | 72 h   | 96 h | 72 h       | 96 h | 120 h |
| SR1      |                          |                               |              | 57            | 977             |                | A+R        | A+R    | A+R  |            |        |      |            |      |       |
| SR2      |                          |                               |              | 69            | 961             |                |            | A, A+R |      | A, A+R     | A, A+R | A    |            |      |       |
| SR3      | Ketone                   | 2,2,6-trimethyl-cyclohexanone | 72           | 82            | 1021            | 1036           |            | A+R    | A+R  |            |        |      |            |      |       |
| SR4      |                          |                               |              | 87            | 1031            |                |            | A      | A    |            |        |      |            |      |       |
| SR5      |                          |                               |              | 167           | 1390            |                |            |        |      |            |        |      |            | A    | A     |
| SR6      |                          |                               |              | 170           | 1401            |                |            |        |      |            | A, A+R |      |            | A+R  |       |

Note: VOCs present in Algae + Rotifer cultures (A + R), Algae cultures (A), or in both culture types (A, A + R)

**Supplemental Table S2.** Putative Biomarkers Emitted After Freeze-Thaw Damage to *Microchloropsis gaditana* Cultures and Did Not Pass the Strict Criteria for Classification as Putative Biomarkers

| Compound | Tentative Compound Class | NIST14 ID                                            | Base Peak m/z | Experimental RI | Theoretical RI | FTA Expt 1 |      | FTA Expt 2 |     |      |      | FTA Expt 3 |     |      |      |
|----------|--------------------------|------------------------------------------------------|---------------|-----------------|----------------|------------|------|------------|-----|------|------|------------|-----|------|------|
|          |                          |                                                      |               |                 |                | 24 h       | 48 h | 1 h        | 6 h | 24 h | 48 h | 1 h        | 6 h | 24 h | 48 h |
| SF1      |                          |                                                      | 41            | 1048            |                |            |      | FTA        | FTA | FTA  |      |            |     |      |      |
| SF2      |                          |                                                      | 43            | 848             |                |            |      | FTA        | FTA |      |      |            |     |      |      |
| SF3      |                          |                                                      | 43            | 2146            |                |            |      |            |     |      |      |            |     | FTA  | FTA  |
| SF4      |                          |                                                      | 43            | 2365            |                |            |      |            |     |      |      |            |     | FTA  | FTA  |
| SF5      |                          |                                                      | 55            | 1906            |                | FTA        | FTA  |            |     |      |      |            |     |      |      |
| SF6      |                          |                                                      | 57            | 1564            |                |            |      |            |     |      |      | FTA        | FTA |      |      |
| SF7      |                          |                                                      | 68            | 2754            |                | A          | A    |            |     |      |      |            |     |      |      |
| SF8      |                          |                                                      | 68            | 899             |                |            |      |            |     |      |      |            |     | FTA  | FTA  |
| SF9      | Alkene                   | 3,7,11,15-tetramethyl-, [R-[R*,R*-(E)]]-2-Hexadecene | 70            | 1844            | 1830           | A          | A    |            |     |      |      |            |     |      |      |
| SF10     |                          |                                                      | 71            | 2117            |                |            |      |            |     |      |      | FTA        | FTA | FTA  |      |
| SF11     |                          |                                                      | 73            | 1851            |                | A          | A    |            |     |      |      |            |     |      |      |
| SF12     | Carboxylic Acid          | n-Hexadecanoic acid                                  | 73            | 1977            | 1968           | A          | A    |            |     |      |      |            |     |      |      |
| SF13     |                          |                                                      | 73            | 1873            |                |            |      |            |     |      |      | FTA        | FTA |      |      |
| SF14     |                          |                                                      | 78            | 766             |                |            |      |            | FTA | FTA  |      |            |     |      |      |
| SF15     |                          |                                                      | 79            | 1513            |                |            |      | FTA        | FTA |      |      |            |     |      |      |
| SF16     |                          |                                                      | 79            | 1289            |                |            |      |            |     |      |      | FTA        | FTA |      |      |
| SF17     |                          |                                                      | 79            | 1582            |                |            |      |            |     |      |      | FTA        | FTA |      |      |
| SF18     |                          |                                                      | 79            | 1647            |                |            |      |            |     |      |      |            | FTA |      |      |
| SF19     |                          |                                                      | 79            | 1879            |                |            |      |            |     |      |      |            | FTA | FTA  |      |
| SF20     |                          |                                                      | 79            | 2123            |                |            |      |            |     |      |      | FTA        | FTA |      |      |
| SF21     |                          |                                                      | 79            | 2296            |                |            |      |            |     |      |      | FTA        | FTA |      |      |
| SF22     | Diterpene                | Neophytadiene                                        | 81            | 1876            | 1837           | A          | A    |            |     |      |      |            |     |      |      |
| SF23     |                          |                                                      | 83            | 1649            |                |            |      | FTA        | FTA |      |      |            |     |      |      |
| SF24     |                          |                                                      | 101           | 1393            |                |            |      |            |     |      |      |            |     | FTA  | FTA  |
| SF25     |                          |                                                      | 109           | 1213            |                |            |      |            | FTA | FTA  |      |            |     |      |      |
| SF26     |                          |                                                      | 111           | 1541            |                | FTA        | FTA  |            |     |      |      |            |     | FTA  | FTA  |
| SF27     | Ketone                   | Ethanone, 1-(4-methylphenyl)-                        | 119           | 1176            | 1183           | FTA        | FTA  |            |     |      |      |            |     | FTA  | FTA  |
| SF28     |                          |                                                      | 131           | 1194            |                |            |      |            | A   | A    |      |            |     |      |      |
| SF29     |                          |                                                      | 139           | 1225            |                |            |      |            |     |      |      |            |     | FTA  | FTA  |
| SF30     | Phthalate Ester          | Diethyl Phthalate                                    | 149           | 1553            | 1594           | A          | A    |            |     |      |      |            |     |      |      |
| SF31     |                          |                                                      | 197           | 1856            |                | FTA        | FTA  |            |     |      |      |            |     | FTA  | FTA  |
| SF32     |                          |                                                      | 207           | 1725            |                | FTA        | FTA  |            |     |      |      |            |     |      |      |
| SF33     |                          |                                                      | 220           | 2104            |                |            |      |            |     |      |      |            |     | FTA  | FTA  |
| SF34     |                          |                                                      | 239           | 2147            |                | FTA        | FTA  |            |     |      |      |            |     |      |      |

Note: VOCs present in Freeze-Thaw Damaged cultures (FTA) or Algae cultures (A).
